# Supplementary material
Source: ML conference proceedings conference paper supplement (https://proceedings.mlr.press/v37/maa15.html)
Supplement: Supplementary file 1 [file maa15-supp.pdf]

---

# Supplementary Material: Finding Linear Structure in Large Datasets with Scalable Canonical Correlation Analysis

---

## 1. Appendix

A brief review of the notations in the main paper:

$$\mathbf{S}_x = \mathbf{X}^\top \mathbf{X}/n, \mathbf{S}_{xy} = \mathbf{X}^\top \mathbf{Y}/n, \mathbf{S}_y = \mathbf{Y}^\top \mathbf{Y}/n, \|u\|_x = (u^\top \mathbf{S}_x u)^{\frac{1}{2}}, \|v\|_y = (v^\top \mathbf{S}_y v)^{\frac{1}{2}}$$

$$\Delta \tilde{\phi}^t = \tilde{\phi}^t - \tilde{\phi}_1, \Delta \tilde{\psi}^t = \tilde{\psi}^t - \tilde{\psi}_1, \Delta \phi^t = \phi^t - \phi_1, \Delta \psi^t = \psi^t - \psi_1$$

Further, we define  $\cos_x(u, v) = \frac{u^\top \mathbf{S}_x v}{\|u\|_x \|v\|_x}$ , the cosine of the angle between two vectors induced by the inner product  $\langle u, v \rangle = u^\top \mathbf{S}_x v$ . Similarly, we define  $\cos_y(u, v) = \frac{u^\top \mathbf{S}_y v}{\|u\|_y \|v\|_y}$ .

To prove the theorem, we will repeatedly use the following two lemmas.

**Lemma 1.**  $\mathbf{S}_{xy} = \mathbf{S}_x \Phi \Lambda \Psi^\top \mathbf{S}_y$

*Proof of Lemma 1.* The proof is in the main paper.

**Lemma 2.**  $\|\Delta \phi^t\|_x \leq \frac{1}{\lambda_1} \sqrt{\frac{2}{1 + \cos_x(\phi^t, \phi_1)}} \|\Delta \tilde{\phi}^t\|_x$  and  $\|\Delta \psi^t\|_y \leq \frac{1}{\lambda_1} \sqrt{\frac{2}{1 + \cos_y(\psi^t, \psi_1)}} \|\Delta \tilde{\psi}^t\|_y$

*Proof of Lemma 2.* Notice that  $\cos_x(\tilde{\phi}^t, \tilde{\phi}_1) = \cos_x(\phi^t, \phi_1)$ , then

$$\|\Delta \tilde{\phi}^t\|_x^2 = \|\tilde{\phi}^t - \tilde{\phi}_1\|_x^2 \geq \|\tilde{\phi}_1\|_x^2 \sin_x^2(\tilde{\phi}^t, \tilde{\phi}_1) = \lambda_1^2 \sin_x^2(\phi^t, \phi_1)$$

Also notice that  $\|\phi^t\|_x = \|\phi_1\|_x = 1$ , which implies  $\cos_x(\phi^t, \phi_1) = 1 - \|\phi^t - \phi_1\|_x^2/2 = 1 - \|\Delta \phi^t\|_x^2/2$ . Further

$$\|\Delta \tilde{\phi}^t\|_x^2 \geq \lambda_1^2 \sin_x^2(\phi^t, \phi_1) = \lambda_1^2 (1 - \cos_x^2(\phi^t, \phi_1)) = \frac{\lambda_1^2}{2} \|\Delta \phi^t\|_x^2 (1 + \cos_x(\phi^t, \phi_1))$$

Square root both sides,

$$\|\Delta \phi^t\|_x \leq \frac{1}{\lambda_1} \sqrt{\frac{2}{1 + \cos_x(\phi^t, \phi_1)}} \|\Delta \tilde{\phi}^t\|_x$$

Similar argument will show that

$$\|\Delta \psi^t\|_y \leq \frac{1}{\lambda_1} \sqrt{\frac{2}{1 + \cos_y(\psi^t, \psi_1)}} \|\Delta \tilde{\psi}^t\|_y$$

### 1.1. Proof of Theorem 2.1

Without loss of generality, we can always assume  $\cos_x(\tilde{\phi}^t, \tilde{\phi}_1), \cos_y(\tilde{\psi}^t, \tilde{\psi}_1) \geq 0$  because the canonical vectors are only identifiable up to a flip in sign and we can always choose  $\tilde{\phi}_1, \tilde{\psi}_1$  such that the cosines are nonnegative. Apply simple algebra to the gradient step  $\tilde{\phi}^{t+1} = \tilde{\phi}^t - \eta(\mathbf{S}_x \tilde{\phi}^t - \mathbf{S}_{xy} \tilde{\psi}^t)$

$$\begin{aligned} \tilde{\phi}^{t+1} - \tilde{\phi}_1 &= \tilde{\phi}^t - \tilde{\phi}_1 - \eta(\mathbf{S}_x(\tilde{\phi}^t - \tilde{\phi}_1) + \mathbf{S}_x \tilde{\phi}_1 - \mathbf{S}_{xy}(\tilde{\psi}^t - \tilde{\psi}_1) - \mathbf{S}_{xy} \tilde{\psi}_1) \\ \Delta \tilde{\phi}^{t+1} &= \Delta \tilde{\phi}^t - \eta(\mathbf{S}_x \Delta \tilde{\phi}^t - \mathbf{S}_{xy} \Delta \tilde{\psi}^t) - \eta(\mathbf{S}_x \tilde{\phi}_1 - \mathbf{S}_{xy} \tilde{\psi}_1) \end{aligned}$$

By Lemma 1,  $\eta(\mathbf{S}_x \tilde{\phi}_1 - \mathbf{S}_{xy} \tilde{\psi}_1) = \eta(\mathbf{S}_x \tilde{\phi}_1 - \lambda_1 \mathbf{S}_x \phi_1) = 0$ , which implies

$$\Delta \tilde{\phi}^{t+1} = \Delta \tilde{\phi}^t - \eta(\mathbf{S}_x \Delta \tilde{\phi}^t - \mathbf{S}_{xy} \Delta \tilde{\psi}^t)$$

Square both sizes,

$$\|\Delta\tilde{\phi}^{t+1}\|^2 = \|\Delta\tilde{\phi}^t\|^2 + \eta^2 \|\mathbf{S}_x \Delta\tilde{\phi}^t - \mathbf{S}_{xy} \Delta\psi^t\|^2 - 2\eta(\Delta\tilde{\phi}^t)^\top (\mathbf{S}_x \Delta\tilde{\phi}^t - \mathbf{S}_{xy} \Delta\psi^t) \quad (1)$$

Apply Lemma 1,

$$\|\mathbf{S}_{xy} \Delta\psi^t\| = \|\mathbf{S}_x \Phi \Lambda \Psi^\top \mathbf{S}_y \Delta\psi^t\| \leq \|\mathbf{S}_x^{\frac{1}{2}}\| \|\mathbf{S}_x^{\frac{1}{2}} \Phi\| \|\Lambda\| \|\Psi^\top \mathbf{S}_y^{\frac{1}{2}}\| \|\mathbf{S}_y^{\frac{1}{2}} \Delta\psi^t\| \leq \lambda_1 L_1^{\frac{1}{2}} \|\Delta\psi^t\|_y$$

The last inequality uses the assumption that  $\lambda_{max}(\mathbf{S}_x), \lambda_{max}(\mathbf{S}_y) \leq L_1$ . By Lemma2,  $\|\Delta\psi^t\|_y \leq \frac{\sqrt{2}}{\lambda_1} \|\Delta\tilde{\psi}^t\|_y$ . Hence,  $\|\mathbf{S}_{xy} \Delta\psi^t\| \leq \sqrt{2} L_1 \|\Delta\tilde{\psi}^t\|_y$ . Also notice that  $\|\mathbf{S}_x \Delta\tilde{\phi}^t\| \leq \|\mathbf{S}_x^{\frac{1}{2}}\| \|\mathbf{S}_x^{\frac{1}{2}} \Delta\tilde{\phi}^t\| \leq L_1^{\frac{1}{2}} \|\Delta\tilde{\phi}^t\|_x$ , then

$$\|\mathbf{S}_x \Delta\tilde{\phi}^t - \mathbf{S}_{xy} \Delta\psi^t\|^2 \leq (L_1^{\frac{1}{2}} \|\Delta\tilde{\phi}^t\|_x + \sqrt{2} L_1^{\frac{1}{2}} \|\Delta\tilde{\psi}^t\|_y)^2 \leq 2L_1 (\|\Delta\tilde{\phi}^t\|_x^2 + 2\|\Delta\tilde{\psi}^t\|_y^2)$$

Substitute into (1),

$$\|\Delta\tilde{\phi}^{t+1}\|^2 \leq \|\Delta\tilde{\phi}^t\|^2 - 2\eta \|\Delta\tilde{\phi}^t\|_x^2 + 2L_1 \eta^2 (\|\Delta\tilde{\phi}^t\|_x^2 + 2\|\Delta\tilde{\psi}^t\|_y^2) + 2\eta(\Delta\tilde{\phi}^t)^\top \mathbf{S}_{xy} \Delta\psi^t \quad (2)$$

Now, we are going to bound  $(\Delta\tilde{\phi}^t)^\top \mathbf{S}_{xy} \Delta\psi^t$ . Because  $\mathbf{S}_y^{\frac{1}{2}} \Psi$  is an orthonormal matrix (orthogonal if  $p = p_1$ ) and  $\mathbf{S}_y^{\frac{1}{2}} \psi_t$  is a unit vector, there exist coefficients  $\alpha_1, \dots, \alpha_p, \alpha_\perp$  and unit vector  $\psi_\perp \in ColSpan(\mathbf{S}_y^{\frac{1}{2}} \Psi)^\perp$  such that  $\mathbf{S}_y^{\frac{1}{2}} \psi_t = \sum_{i=1}^p \alpha_i \mathbf{S}_y^{\frac{1}{2}} \psi_i + \alpha_\perp \mathbf{S}_y^{\frac{1}{2}} \psi_\perp$ ,  $\sum_{i=1}^p \alpha_i^2 + \alpha_\perp^2 = 1$ . Therefore,

$$\begin{aligned} (\Delta\tilde{\phi}^t)^\top \mathbf{S}_x \Phi \Lambda \Psi^\top \mathbf{S}_y \Delta\psi^t &= \Delta\tilde{\phi}^t \mathbf{S}_x \Phi \Lambda (\mathbf{S}_y^{\frac{1}{2}} \Psi)^\top \left\{ (\alpha_1 - 1) \mathbf{S}_y^{\frac{1}{2}} \psi_1 + \sum_{i=2}^p \alpha_i \mathbf{S}_y^{\frac{1}{2}} \psi_i + \alpha_\perp \mathbf{S}_y^{\frac{1}{2}} \psi_\perp \right\} \\ &= \lambda_1 (\alpha_1 - 1) (\Delta\tilde{\phi}^t)^\top \mathbf{S}_x \phi_1 + \sum_{i=2}^p \alpha_i \lambda_i (\Delta\tilde{\phi}^t)^\top \mathbf{S}_x \phi_i \end{aligned}$$

By Cauchy-Schwarz inequality,

$$\begin{aligned} (\Delta\tilde{\phi}^t)^\top \mathbf{S}_x \Phi \Lambda \Psi^\top \mathbf{S}_y \Delta\psi^t &\leq \left( \lambda_1^2 (1 - \alpha_1)^2 + \sum_{i=2}^p \alpha_i^2 \lambda_i^2 \right)^{\frac{1}{2}} \left( \sum_{i=1}^p ((\Delta\tilde{\phi}^t)^\top \mathbf{S}_x \phi_i)^2 \right)^{\frac{1}{2}} \\ &\leq \left( \lambda_1^2 (1 - \alpha_1)^2 + \lambda_2^2 (1 - \alpha_1^2) \right)^{\frac{1}{2}} \|\Delta\tilde{\phi}^t\|_x \\ &= \left( \lambda_1^2 \frac{1 - \alpha_1}{1 + \alpha_1} + \lambda_2^2 \right)^{\frac{1}{2}} (1 - \alpha_1^2)^{\frac{1}{2}} \|\Delta\tilde{\phi}^t\|_x \end{aligned}$$

By definition,  $1 - \alpha_1 = 1 - \cos_y(\psi^t, \psi_1) = \frac{\|\Delta\tilde{\psi}^t\|_y^2}{2}$ . Further by Lemma 2,

$$1 - \alpha_1 \leq \frac{1}{\lambda_1^2 (1 + \alpha_1)} \|\Delta\tilde{\psi}^t\|_y^2$$

Therefore,

$$\begin{aligned} (\Delta\tilde{\phi}^t)^\top \mathbf{S}_x \Phi \Lambda \Psi^\top \mathbf{S}_y \Delta\psi^t &\leq \left( \frac{1 - \alpha_1}{1 + \alpha_1} + \frac{\lambda_2^2}{\lambda_1^2} \right)^{\frac{1}{2}} \|\Delta\tilde{\phi}^t\|_x \|\Delta\tilde{\psi}^t\|_y \\ &\leq \left( \frac{\|\Delta\tilde{\psi}^t\|_y^2}{\lambda_1^2 (1 + \alpha_1)^2} + \frac{\lambda_2^2}{\lambda_1^2} \right)^{\frac{1}{2}} \|\Delta\tilde{\phi}^t\|_x \|\Delta\tilde{\psi}^t\|_y \\ &\leq \frac{1}{2} \left( \frac{\|\Delta\tilde{\psi}^t\|_y^2}{\lambda_1^2} + \frac{\lambda_2^2}{\lambda_1^2} \right)^{\frac{1}{2}} (\|\Delta\tilde{\phi}^t\|_x^2 + \|\Delta\tilde{\psi}^t\|_y^2) \end{aligned}$$

Substitute into (2),

$$\|\Delta\tilde{\phi}^{t+1}\|^2 \leq \|\Delta\tilde{\phi}^t\|^2 - 2\eta \|\Delta\tilde{\phi}^t\|_x^2 + 2L_1 \eta^2 (\|\Delta\tilde{\phi}^t\|_x^2 + 2\|\Delta\tilde{\psi}^t\|_y^2) + \eta \left( \frac{\|\Delta\tilde{\psi}^t\|_y^2}{\lambda_1^2} + \frac{\lambda_2^2}{\lambda_1^2} \right)^{\frac{1}{2}} (\|\Delta\tilde{\phi}^t\|_x^2 + \|\Delta\tilde{\psi}^t\|_y^2)$$

Similar analysis implies that,

$$\|\Delta\tilde{\psi}^{t+1}\|^2 \leq \|\Delta\tilde{\psi}^t\|^2 - 2\eta\|\Delta\tilde{\psi}^t\|_y^2 + 2L_1\eta^2\left(\|\Delta\tilde{\psi}^t\|_y^2 + 2\|\Delta\tilde{\phi}^t\|_x^2\right) + \eta\left(\frac{\|\Delta\tilde{\phi}^t\|_x^2}{\lambda_1^2} + \frac{\lambda_2^2}{\lambda_1^2}\right)^{\frac{1}{2}}\left(\|\Delta\tilde{\phi}^t\|_x^2 + \|\Delta\tilde{\psi}^t\|_y^2\right)$$

Add these two inequalities,

$$\begin{aligned} \|\Delta\tilde{\phi}^{t+1}\|^2 + \|\Delta\tilde{\psi}^{t+1}\|^2 &\leq \left(\|\Delta\tilde{\phi}^t\|^2 + \|\Delta\tilde{\psi}^t\|^2\right) - 2\eta\left\{1 - \frac{1}{2}\left(\frac{\|\Delta\tilde{\psi}^t\|_y^2}{\lambda_1^2} + \frac{\lambda_2^2}{\lambda_1^2}\right)^{\frac{1}{2}} - \frac{1}{2}\left(\frac{\|\Delta\tilde{\phi}^t\|_x^2}{\lambda_1^2} + \frac{\lambda_2^2}{\lambda_1^2}\right)^{\frac{1}{2}}\right. \\ &\quad \left. - 3L_1\eta\right\}\left(\|\Delta\tilde{\phi}^t\|_x^2 + \|\Delta\tilde{\psi}^t\|_y^2\right) \end{aligned}$$

Notice that  $\sqrt{a} + \sqrt{b} \leq \sqrt{2(a+b)}$ , we have

$$\begin{aligned} \left(\frac{\|\Delta\tilde{\psi}^t\|_y^2}{\lambda_1^2} + \frac{\lambda_2^2}{\lambda_1^2}\right)^{\frac{1}{2}} + \left(\frac{\|\Delta\tilde{\phi}^t\|_x^2}{\lambda_1^2} + \frac{\lambda_2^2}{\lambda_1^2}\right)^{\frac{1}{2}} &\leq \left(\frac{2\|\Delta\tilde{\psi}^t\|_y^2}{\lambda_1^2} + \frac{2\|\Delta\tilde{\phi}^t\|_x^2}{\lambda_1^2} + \frac{4\lambda_2^2}{\lambda_1^2}\right)^{\frac{1}{2}} \\ &\leq \left(\frac{2L_1\|\Delta\tilde{\psi}^t\|^2}{\lambda_1^2} + \frac{2L_1\|\Delta\tilde{\phi}^t\|^2}{\lambda_1^2} + \frac{4\lambda_2^2}{\lambda_1^2}\right)^{\frac{1}{2}} \\ &= \frac{1}{2\lambda_1}\left(\frac{L_1}{2}\|\Delta\tilde{\psi}^t\|^2 + \frac{L_1}{2}\|\Delta\tilde{\phi}^t\|^2 + \lambda_2^2\right)^{\frac{1}{2}} \end{aligned}$$

Then,

$$\begin{aligned} \|\Delta\tilde{\phi}^{t+1}\|^2 + \|\Delta\tilde{\psi}^{t+1}\|^2 &\leq \left(\|\Delta\tilde{\phi}^t\|^2 + \|\Delta\tilde{\psi}^t\|^2\right) - 2\eta\left\{1 - \frac{1}{\lambda_1}\left(\frac{L_1}{2}\|\Delta\tilde{\psi}^t\|^2 + \frac{L_1}{2}\|\Delta\tilde{\phi}^t\|^2 + \lambda_2^2\right)^{\frac{1}{2}}\right. \\ &\quad \left. - 3L_1\eta\right\}\left(\|\Delta\tilde{\phi}^t\|_x^2 + \|\Delta\tilde{\psi}^t\|_y^2\right) \end{aligned} \quad (3)$$

By definition,  $\delta = 1 - \frac{1}{\lambda_1}\left(\frac{L_1}{2}\|\Delta\tilde{\psi}^0\|^2 + \frac{L_1}{2}\|\Delta\tilde{\phi}^0\|^2 + \lambda_2^2\right)^{\frac{1}{2}}$  and  $\eta = \frac{\delta}{6L_1}$ . Substitute in (3) with  $t = 0$ ,

$$\begin{aligned} \|\Delta\tilde{\phi}^1\|^2 + \|\Delta\tilde{\psi}^1\|^2 &= \left(\|\Delta\tilde{\phi}^0\|^2 + \|\Delta\tilde{\psi}^0\|^2\right) - \frac{\delta^2}{6L_1}\left(\|\Delta\tilde{\phi}^0\|_x^2 + \|\Delta\tilde{\psi}^0\|_y^2\right) \\ &\leq \left(\|\Delta\tilde{\phi}^0\|^2 + \|\Delta\tilde{\psi}^0\|^2\right) - \frac{\delta^2}{6L_1L_2}\left(\|\Delta\tilde{\phi}^0\|^2 + \|\Delta\tilde{\psi}^0\|^2\right) \\ &\leq \left(1 - \frac{\delta^2}{6L_1L_2}\right)\left(\|\Delta\tilde{\phi}^0\|^2 + \|\Delta\tilde{\psi}^0\|^2\right) \end{aligned}$$

It follows by induction that  $\forall t \in \mathbb{N}_+$

$$\|\Delta\tilde{\phi}^{t+1}\|^2 + \|\Delta\tilde{\psi}^{t+1}\|^2 \leq \left(1 - \frac{\delta^2}{6L_1L_2}\right)\left(\|\Delta\tilde{\phi}^t\|^2 + \|\Delta\tilde{\psi}^t\|^2\right)$$

## 1.2. Proof of Proposition 2.3

Substitute  $(\Phi^t, \Psi^t, \tilde{\Phi}^t, \tilde{\Psi}^t) = (\Phi_k, \Psi_k, \Phi_k \Lambda_k, \Psi_k \Lambda_k) \mathbf{Q}$  into the iterative formula in Algorithm 4.

$$\begin{aligned} \tilde{\Phi}^{t+1} &= \Phi_k \Lambda_k \mathbf{Q} - \eta_1 (\mathbf{S}_x \Phi_k \Lambda_k - \mathbf{S}_{xy} \Psi_k) \mathbf{Q} \\ &= \Phi_k \Lambda_k \mathbf{Q} - \eta_1 (\mathbf{S}_x \Phi_k \Lambda_k - \mathbf{S}_x \Phi \Lambda \Psi^\top \mathbf{S}_y \Psi_k) \mathbf{Q} \\ &= \Phi_k \Lambda_k \mathbf{Q} - \eta_1 (\mathbf{S}_x \Phi_k \Lambda_k - \mathbf{S}_x \Phi_k \Lambda_k) \mathbf{Q} \\ &= \Phi_k \Lambda_k \mathbf{Q} \end{aligned}$$

The second equality is direct application of Lemma 1. The third equality is due to the fact that  $\Psi^\top \mathbf{S}_y \Psi = I_p$ . Then,

$$(\tilde{\Phi}^{t+1})^\top \mathbf{S}_x \tilde{\Phi}^{t+1} = \mathbf{Q}^\top \Lambda_k^2 \mathbf{Q}$$

and

$$\Phi^{t+1} = \tilde{\Phi}^{t+1} \mathbf{Q}^\top \Lambda_k^{-1} \mathbf{Q} = \Phi_k \mathbf{Q}$$

Therefore  $(\Phi^{t+1}, \tilde{\Phi}^{t+1}) = (\Phi^t, \tilde{\Phi}^t) = (\Phi_k, \Phi_k \Lambda_k) \mathbf{Q}$ . A symmetric argument will show that  $(\Psi^{t+1}, \tilde{\Psi}^{t+1}) = (\Psi^t, \tilde{\Psi}^t) = (\Psi_k, \Psi_k \Lambda_k) \mathbf{Q}$ , which completes the proof.
